# Supplementary material
Source: publisher figshare collection journal article supplement (https://springernature.figshare.com/ndownloader/files/22008735)
Supplement: Supplementary file [file 22008735]

### **Additional File 3: Included measures of PROGRESS-Plus factors**

Adapted from Attwood *et al.* (2016)<sup>1</sup>, Oliver *et al.* (2008)<sup>2</sup> and O'Neill *et al.* (2014)<sup>3</sup>:

- **Place of residence**  
*Urban/rural/inner-city classifications; perceptions of local environment (e.g. the Neighbourhood Environment Walkability Scale)*
- **Race, ethnicity, culture and language**  
*Racial or ethnic group classifications (White/mixed or multiple ethnicity/Asian/Black/other), mother tongue or country of origin*
- **Occupation**  
*Unemployed/employed/retired; manual or non-manual work; full-time or part-time employment; graded hierarchies measuring occupational status or prestige*
- **Gender and sex**  
*Male or female classifications*
- **Religion**  
*Self-reported religious denomination; details of belief systems or values held; religious activities engaged in or attendance at religious institutions*
- **Education**  
*Number of years in full-time education; educational attainment or qualifications achieved; institutions attended (e.g. School/FE/HE)*
- **Socioeconomic status**  
*Poverty level; income (continuous level or proportion falling into income brackets), asset-based measures such as car ownership or housing tenure; receipt of state welfare or health payment assistance*
- **Social capital**  
*Perceptions of social norms surrounding trust or reciprocity; social support (e.g. marital or living status, household size, social support from friends, family or relevant others); social networks; civic participation or group membership*

#### **Plus Factors**

- **Age** – *mean or median age of participants; age brackets*
- **Disability** – *measures of functioning; health status; quality of life; physical tests of functioning*
- **Sexual Orientation** – *e.g. hetero-/homo/bi-/trans-sexual classifications*

---

<sup>1</sup> Attwood S, van Sluijs E, Sutton S. Exploring equity in primary-care-based physical activity interventions using PROGRESS-plus: a systematic review and evidence synthesis. *Int J Behav Nutr Phy Act.* 2016;13:60

<sup>2</sup> Oliver S, Kavanagh J, Caird J, Lorenc T, Oliver K, Harden A. Health promotion inequalities and young people's health. A systematic review of research. London: University of London; 2008

<sup>3</sup> O'Neill J, Tabish H, Welch V, Petticrew M, Pottie K, Clarke M. Applying an equity lens to interventions: using PROGRESS ensures consideration of socially stratifying factors to illuminate inequities in health. *J Clin Epidemiol.* 2014;61:56–64
